# Supplementary material
Source: PubMed Central journal article supplement (PMC2422825)
Supplement: me.2007-0474_1.pdf [file me.2007-0474_1.pdf]

## SUPPLEMENTARY ONLINE MATERIAL

|                           |            |
|---------------------------|------------|
| <b>List</b>               | page 1     |
| Fig. S1                   | page 2     |
| Note N1-primer design     | page 3-7   |
| Note N2-Spretus sequences | page 8-15  |
| Note N3-PCR-primers       | page 16-17 |
| Note N4                   | page 18    |
| Note N5                   | page 19    |
| Note N6                   | page 20    |
| Note N7                   | page 21    |

## Genomic DNA

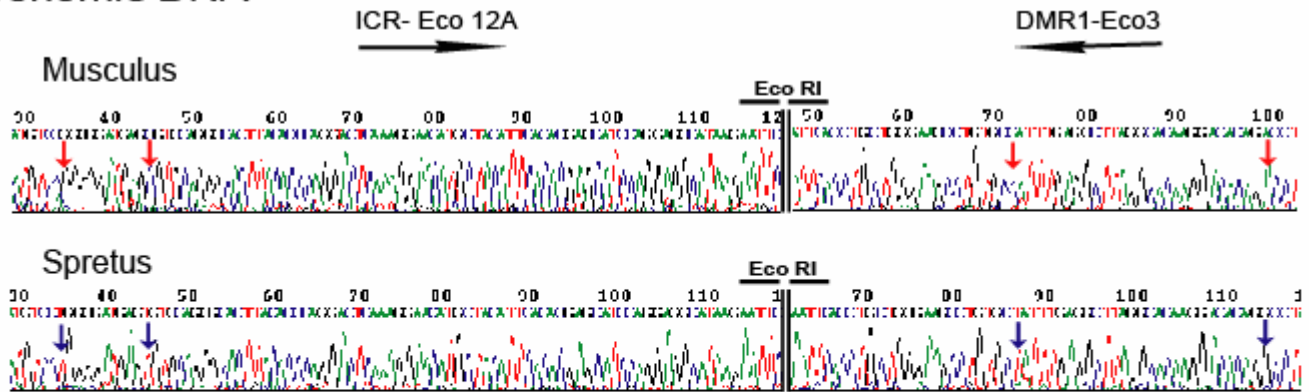

## 3C-Product

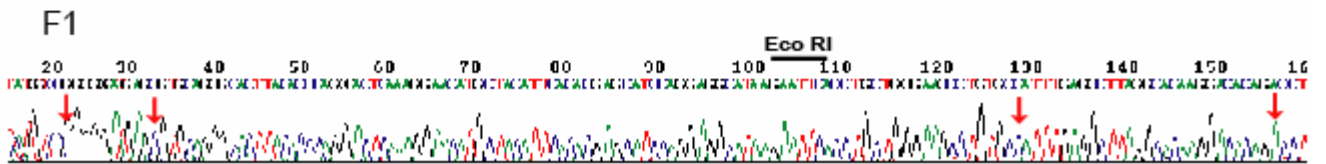

**Figure S-1.** DNA sequencing of the DMR1-ICR (Eco #3-Eco #12A) cross-linked product.

Top, genomic sequences of the ICR and DMR1 fragments of *M. musculus* and *M. spretus*.

Note the SNPs marked by arrows (red, *Musculus*; blue, *Spretus*). Bottom, the two Eco RI

fragments were cross-linked in 3C products of F1 newborn liver. Both ICR and DMR1

fragments were from the maternal allele (*Musculus*).

### **Note N1: *M. Spretus* sequencing and 3C primer design**

We first used “Gene sorter” to sort the mouse *Igf2* in the USC data base (<http://genome.ucsc.edu/>). We then mapped the Eco RI sites and selected 37 RI sites. We used *primer3* program ([http://www-genome.wi.mit.edu/genome\\_software/other/primer3.html](http://www-genome.wi.mit.edu/genome_software/other/primer3.html)) to design primers across the selected sites to amplify ~ 500 bp DNA fragments from *M. spretus* liver DNA. We obtained 33 *Spretus* PCR products and sequenced these products by direct PCR sequencing.

To design 3C primers the *M. spretus* sequences encompassing the 32 RI sites were aligned with the *M. musculus* sequences using BLAT (<http://genome.ucsc.edu/>). We employed the *primer3* program and chose 3C primers ( $T_m \sim 74^\circ\text{C}$ ) across the 32 RI sites for both mouse strains in the homologous sequence regions avoiding any SNP sites (that are abundant) in the selected primers. Samples of the BLAT results using the mouse genome (Assembly Feb 2006) to design primers across the Eco #3 (near the *Igf2* DMR1) and Eco #12A and #12B (ICR) sites are listed below. The RI sites (yellow) and the SNPs (blue) are showed. The designed primers are underlined and the polymorphic restriction sites used to distinguish the two parental alleles are highlighted (green).

**Spretus sequence Eco #3 (9f) (DMR1, *StuI*-site AGGCCT in *Spretus*)**

taagcactgntggactctgccgaggaagctc  
 tgctgttggtggccctgcagttcactggcaggtactgggtagggaccagggaggtag  
 aggctgtgtctgggtgaatactggagactggggggcagcatgtaggcctgtgtcctgtg  
 cctaagcctcaaatagcacaggttcccagcaggtgaattccaccctctccagectat  
 catgctcatgccagaagaagccaagaatcttcttcaaatgttggtcagacactaaaa  
 caattacatagtggtatggcttctgtctatctaGacccaGgacactggccttcctgctg  
 acccctctccagtgGcccacagcaacccttacttacttttggtgta

**Spretus-Alignment of Eco3 - chr7:142475848-142476222**

---

|             |            |            |            |            |            |     |
|-------------|------------|------------|------------|------------|------------|-----|
| tAAGCACTgn  | TGGA       | CTCTGC     | CGAGGAAGCT | CTGCTGTTTG | GTGGCCCTGC | 50  |
| AGTTCACTGG  | TCAGGTACTG | GGTAGGGACC | AGGGAGGTAG | AGGCTGTGTC |            | 100 |
| TGGTGAATA   | CTGGAGACTG | GGGGGCAGCA | TGTAGGcCTG | TGTCCTTGTG |            | 150 |
| CCTAAGCCTC  | AAATaGCACA | GGCTTCCCAG | CAGGTGAATT | CACCCCTCT  |            | 200 |
| TCCAGccTAT  | CATGCTCATG | CCAGAAAGAA | GCCAAGAATC | TTCTTTCAAA |            | 250 |
| TGTTGGTTCA  | GACACTAAAA | CAATTACATA | GTGGTATGGC | TTCTGTCTAT |            | 300 |
| CTAGACCCAG  | GACACTGGCC | TTCCCTGCTG | ACCCCTCTCC | AGTgGCCAC  |            | 350 |
| AGCAACCCCTT | ACTTACTTTT | GGTGTGa    |            |            |            |     |

---

**Musculus-Genomic chr7 (reverse strand):**

|             |             |             |            |             |           |
|-------------|-------------|-------------|------------|-------------|-----------|
| ccttaggaga  | gtgtgtgtcc  | taattctatt  | gtgttctgaa | ggccatgggt  | 142476273 |
| ttcctgtgtg  | tgaatggggg  | gggaagcagc  | tagagagggc | acggggccag  | 142476223 |
| AAGCACTgTG  | GACTCTGCCG  | AGGAAGCTCT  | GCTGTTTGGT | GGCCCTGCAG  | 142476173 |
| TTCACTGGTC  | AGGTACTGGG  | TAGGGACCAG  | GGAGGTAGAG | GCTGTGTCTG  | 142476123 |
| GTGGAATACT  | GGAGACTGGG  | GGGCAGCATG  | TAGGtCTGTG | TCCTTGTGCC  | 142476073 |
| TAAGCCTCAA  | ATgGCACAGG  | CTTCCCAGCA  | GGTGAATTC  | ACCCCTCTTC  | 142476023 |
| CAGgaTATCA  | TGCTCATGCC  | AGAAAGAAGC  | CAAGAATCTT | CTTTCAAATG  | 142475973 |
| TTGGTTCAGA  | CACTAAAAACA | ATTACATAGT  | GGTATGGCTT | CaGTCTATc   | 142475923 |
| AGACCCAGGA  | CACTGGCCTT  | CCCTGCTGAC  | CCCTCTCCAG | TgcccCCCACA | 142475873 |
| GCAACCCCTTA | CTTACTTTTG  | GTGTGgggttg | tgttgatcag | tttgggtgcaa | 142475823 |
| tctcatggtt  | ggtgggttcag | gtagtgactt  | cttcccaggc | ttgcagattg  | 142475773 |
| gcatagagca  | ttgcttgggt  | cttcc       |            |             |           |

---

**Side by Side Alignment (Spretus, top /Musculus, bottom)**

```
000000002 aagcact 000000008
<<<<<<<<< ||||| <<<<<<<<<
142476222 aagcact 142476216

000000011 tggactctgccgaggaagctctgctgtttggaggccctgcagttcactgg 000000060
<<<<<<<<< ||||| <<<<<<<<< <<<<<<<<<
142476214 tggactctgccgaggaagctctgctgtttggaggccctgcagttcactgg 142476165

000000061 tcaggtactgggtagggaccagggaggttagaggctgtgtctggtggaata 000000110
<<<<<<<<< ||||| <<<<<<<<< <<<<<<<<<
142476164 tcaggtactgggtagggaccagggaggttagaggctgtgtctggtggaata 142476115

000000111 ctggagactggggggcagcatgtaggcctgtgtccttgtgcctaagcctc 000000160
<<<<<<<<< ||||| <<<<<<<<< <<<<<<<<<
142476114 ctggagactggggggcagcatgtaggctgtgtccttgtgcctaagcctc 142476065

000000161 aaatagcacaggcttcccagcaggtgaattccacccctcttcagccat 000000210
<<<<<<<<< ||||| <<<<<<<<< <<<<<<<<<
142476064 aaatggcacaggcttcccagcaggtgaattccacccctcttcaggatat 142476015

000000211 catgctcatgccagaaagaagccaagaatcttctttcaaagtgtggttca 000000260
<<<<<<<<< ||||| <<<<<<<<< <<<<<<<<<
142476014 catgctcatgccagaaagaagccaagaatcttctttcaaagtgtggttca 142475965

000000261 gacactaaaacaattacatagtggtatggcttctgtctatctagaccag 000000310
<<<<<<<<< ||||| <<<<<<<<< <<<<<<<<<
142475964 gacactaaaacaattacatagtggtatggcttctgtctatctagaccag 142475915

000000311 gacactggccttccctgctgaccctctccagtg 000000344
<<<<<<<<< ||||| <<<<<<<<<
142475914 gacactggccttccctgctgaccctctccagtg 142475881

000000346 cccacagcaacccttacttacttttgggtgtg 000000376
<<<<<<<<< ||||| <<<<<<<<<
142475878 cccacagcaacccttacttacttttgggtgtg 142475848
```

**Spretus sequence-Eco #12A, #12B (12f)**  
(CTCF binding site #1 in bold, polymorphic Hpa II is hi-lited (green))

```
ttagtactttctgccctggcagctcccagattgacaaggcatgcctaactgtttctgg
aagaagagatctagctctatcccatcgaatgcaaatgaaccactaggagttagcctga
ccaaggaagcttctctgctcactgtccatgcaatgcagtcaaaagtctgtgactataca
ggaggaaacatagcagctctgtgactatacaggaggaacatagccgaggctaaaggccat
ggtgccatgtaagtgttctgtgcagcAActgatgaccagacagtactgagtctgcctg
gagcctgagttaaaaccgagaaatagccattgcctacagttcccgaatcaccacaagga
aagaaaaaggtggtgagaaaatagagattctatftcatgctctggggatgagtgtgca
gggacttacaccaggactcaaggaacatgctacattcacacgagcatccaggaggca
taagaaftctgcaaggagaccatgccctattcttgacgtctgctgaatcagttgtgggg
ttatacgcgggagttgccgctggtggcagcaaatcattgacgcaaacctaaagagc
ccccgaccccggaattgaaftcacaatggcaatgctgtgggtcacccaagttcagt
acctcaggggtcacaatgccacta
```

*Spretus*, Alignment of *EcoI2A12B* - chr7:142391308-142392040

```

TTaGTACTTT CTGCCCTGGC AGTCCCCAGA TTGACAAAGG CATGCCTAAC 100
TTGTTTCTGG AAGAAGAGAT CTAGCTCTAT CCCATCGAAA TGCAAATGAA 150
CCACTAGGAG TTTAGCCTGA CCAAGGAAGC TTTCTGCTC ACTGTCCATg 200
CAATGCAGTC AAAAGTGTCTG TGACTATACA GGAGGAACAT AGCAGTGCTG 250
TGACTtATACA GGAGGAACAT AGCcGAGGCT AAAGGGCCAT GGTGCCATGT 300
AAGTGTGTTC TGTGCAGCAA CTGATGACCA GACAGTACTG AGTCTGCCTG 350
GAGCCTGAGT TAAAACCGAG AAAATAGCCA TTGCCTACAG TTCCCGAATC 400
ACCACAAGGA AAGAAAAAGG TTGGTGAGAA AATAGAGATT CTATTTTCAT 450
GTCCtGGGGA TGAGtGTGCA GGGCACTTAC ACCCAGGACT CAAAGGAACA 500
TGCTACATTC ACACGAGCAT CCAGGAGGCA TAAGAATTCt GCAAGGAGAC 550
CATGCCCTAT TCTTGAGCGT CTGCTGAATC AGTTGTGGGG TTTATACGCG 600
GGAGTTGCCG CGTGgGTGGC GCAAATCGA TTGCGCCAAA CCTAAAGAGC 650
CCCCcACCC CcGgaATTGG AATTCACAAA TGGCAATGCT GTGGGTCACC 700
CAAGTTcAGT ACCTCAGGGG GTCACAAATG CCACTA

```

**Musculus, Genomic chr7 (reverse strand):**

```

ttagagtacc atgcttcagt taggttctgt ttgcccacca gctgctagcc 142392091
atcacctagt cctcaatgtc acgtactatt acaatggcca aaacagacta 142392041
GACTTGCACC CAAGAGCCCC CCTCCCcGGC AAAGCTTACT GCCCTCATtG 142391991
TACTTTCTGC CCTGGCAGTC CCCAGATTGA CAAAGGCATG CCTAACTTGT 142391941
TTCTGGAAGA AGAGATCTAG CTCTATCCCA TCGAAATGCA AATGAACCAC 142391891
TAGGAGTTTA GCCTGACCAA GGAAGCTTTC CTGCTCACTG TCCAttCAAT 142391841
GCAGTCAAAA GTGCTGTGAC TATACAGGAG GAACATAGCA GTGCTGTGAC 142391791
cATACAGGAG GAACATAGca GAGGCTAAAG GGCCATGGTG CCATGTAAGT 142391741
GTGTTCTGTG CAGCAACTGA TGACCAGACA GTACTGAGTC TGCTGGAGC 142391691
CTGAGTTAAA ACCGAGAAAA TAGCCATTGC CTACAGTTCC CGAATCACCA 142391641
CAAGGAAAGA AAAAGGTTGG TGAGAAAATA GAGATTCTAT TTTcATGTCC 142391591
gGGGGATGAG cGTGCAGGGC ACTTACACC AGGACTCAAA GGAACATGCT 142391541
ACATTCACAC GAGCATCCAG GAGGCATAAG AATTCtGCAA GGAGACCATG 142391491
CCCTATTCTT GGACGTCTGC TGAATCAGTT GTGGGGTTTA TACGCGGGAG 142391441
TTGCCCGCGTG GTGGCAGCAA AATCGATTGC GCCAAACCTA AAGAGCCCCC 142391391
CcACCCctGG tATTGGAATT CACAAATGGC AATGCTGTGG GTCACCCAAG 142391341
TTCAGTACCT CAgGGGGGTC ACAAATGCCA CTAgggggggc aggacacatg 142391291
cattttctag gctggtacct cgtggactcg gactcccaaa tcaacaaggt 142391241
cggcttactc tctgcaaaga atcctttgtg tgt

```



## Note N2: *M. Spretus* sequences

*Spretus* sequences across the 29 RI sites (yellow hi-lited) are listed below. Three RI sequences (Eco #3, Eco #12A and 12B are listed in Supplementary Material, Note N1). Sequences were read by forward (f) and/or reverse (r) PCR primers. There were two polymorphic RI sites and 3 large insertion/deletions (22 bp and 44 bp). To find *Spretus/Musculus* SNPs and polymorphic sites, simply BLAT the sequence to the Mouse genome using BLAT (<http://genome.ucsc.edu/>) as described in Supplementary Material, Note N1.

### mLit1 (#34f)

```
tgccctcattggaggctggaaatctgttacctgcaggcactaagggagccaagctaccat
gggatgggttctgcgttgactatggatgcctgatacagtaggaatattggggtgtagcg
gggaggtacagggtgaggttagactctcaaggccactcaaaagatccagctaattgcatc
tatatcccttcccccatagaaatggacctggcaggaaagccagtactgttcaagtaa
catgggaatggagtttgggagtcaggctgtcatctatgaattccagcctccactatac
caggggtccctgggggccatctggtgagtgacaggctgtgctgtgcctcccactggcc
tctggcaccacactgcactgtaacaacagggcgtcggagctggcgtccgattacggcc
ccctcggcctgctgaattcctgaggagagccggcacatcaggctcctggccggg
aggaggacaatccccacagtgtctgtcagctggcactgtagcatgtggcctgctgagag
ggcagccccggccagcccaggctgggtccaaccggcatctccagcccccaacaagg
```

### mAscl2 (#1f)

```
ggtatgctgtgtg
tgcaaggatgagcacagcagtgaggatggaggtggaggatatctggatgttgctct
ccctccagcctgttaagatagacgttgtgttcattattgcagctcctgggctagctg
gtctggaagttgaagggaattcctgttctctcttgcattttggattctatgggt
ctgaggattgaactcaggtcctcacactgcacagcaagcttacttaacaatctcc
ccagaccaactggattgctccaacagcagagaagtgactagactatccaagtctctt
agcagacacccgggaaattcagactcactgccactcccacagcaaggttatcaaaagg
ctggattagatgatacagccttgatgaatcctggagagtcaggaacctgcaggcagcc
ccacactggcagtagatgctccaaggcagtcgaaagcagagagaagcctggtttgta
gcctccccagtcggatattacaagaagtaactccaggttact
```

### mTh (#3f)

```
ctgaatgcctaagaagacctaagccctagtatgactct
ggaacaggtacaagttaaaccaaatggaagccttaggccatagtaagatgctaagaa
gatagtagacctctgtgaGacctggggaacCtAGGctcccaaaagactctggggaag
gccttaggcaccagagagacctgcaaagcctcaggtcatagtgaactcagcgaaggcc
atacactctgctgagatccaaggaggtcttaggccctgtgagacctggaggaggata
cagtttctaataagactccaggaagaagcccttaggactcgtgagagtgaggatagga
attccacttcagagcctaccatgactttaggccacagtgagagctgggaaaggcctca
ggctctagaagatctaggaagtgcctcagaccacaagaggaaggctatagatcac
```



**Ins-a (#4f)**

ccaattagaatctaagcaaggccttaggacatattg  
agaaaatggagaaggttttaaagcccagtgacagccttgggaagtccttaggccctagtga  
aaatcttggaaagtcacataggcccagtgagaacctgttgaagtttagaccccagtgag  
acctgtaggaggacttagaattcagtgacacttgggagagtccttgtgtccactggg  
aacctggagaagctttaagtaccagtgagaacctggtatagagtgagagcatttaaga  
ggcctaggggaccagtgaaaatgtcaaaggcctgtgaaaattgggaaaatttttagac  
atcagtgagaccctggtatatttaggcctattgagagcttatgtaatgccttaggctt  
cagtgagaacctgggcaaggctttaagaccagtgagaa

**Ins-b (#5f)**

ggcaccaagtgttttctggttcctaggga  
acagggcagtgccaaatcaggaaacagaagagtaaggaaccccaaccactccaagcgg  
aggctgggaaaggttttagctggaatagagcatgcactaacagatgggacagctggc  
tttagctctgaagcaagtattacatatggagacttcttggccttcaggtacttatctt  
gttattggactgcaggagatgtaccacaggcctcagctcagctgaccccaagtgg  
gctatggaaagagatagaggaggggaccattaagtgtcttctgctccgaattcgc  
ttcctctacctctgagagagagctggggactcagctgagttaagaaccagctatcaa  
tgggaactgtgaaacagtccaagggacaagataactaggtcctcaactgcaacttctctgg  
ggaatgatgtgaaaaatgctcaGccaaggacaagaaagcatcAccactctgggacan  
tgcccctgctgtgaactggttcacaggtatcagggccccttgttaGaactc

**Ins-c (#6f)**

caggTAggtactcttctcagtgggcctggctcccagctaagacctcagggact  
tgaggtaggatatggcctcctcttactgtggaactttgctatcctcaaccagcctat  
cttccagtcattgtttcaacatggccctgtgatgccttctgcccctgctggccctg  
ctcttctctgggagtcaccaccaccaggcctttgtcaagcagcacctttgtggttcc  
cacctgtggaggtctctactgtgtgtggggagcgtggtcttctacacaccatg  
tcccgcctggaagtggaggaccacaaggtgagttctgccactgaattctgtccccagtg  
ctaactacctggtttctcacttgggacattgtaaatgtgtcctaggtgtggagg  
gtctcgggataaccaggagtagggacacgtttctgggggaaactagacatatgtaaca  
tggcagctgccaggaatgagtaagaatcctgccttaagggtccttgggtgtagtaact  
gggatatgtgactagatcccagatgggtacctatttagggccctcatagagcactgcac  
tgactgaggatgagtaggcttttagaggcccatgtgtccatccatgaccagtgactgtcc

**Eco #1(7f)**

cagagtagtatttttattgtttttctgtctgtgtcttcatagtt  
acacctaatattgttctttttaaaggtcccttctctctgtgtcccctagactgtg  
tccatggaacatgaaataaaatttgaagggtatgcccttcaactctaactactgat  
actttgtccccactttgctcagtggcactatggttttagtactcctcatgggcaact  
gttacctgacttctccttcttaaacatcagtgftaaaataaaataaaataaaat  
aaaataaaataaaataaaataaaataaaatagctctgggcctattctgaggggaaat  
tcagggaatagagcttgatacatttaagaaaaataaagttttcttctctgctatga  
cctctagatagccatttttcttattgcctcttctccttaccagctcagaggaa  
gcgcctctctggagcttcatggaatctctcaggtttgggaaatccttcaacttct  
ttcatgtcaacctctgcttagtaaatcacagccaaactctcagagagccttagtggg  
agcagtttgaatgtcaagcatgttctgtggacaataagggcagcactgtcacatac  
ttctagctcagggcctagtaggttagtaaatc

**Eco #2 (8r)**

catgggattgacgccatgtgcaaacaccatgcacccac  
gtgcgtaatgtcgtganngtggcgtggcacaggtaaaaagggcgtggcttatgcaaatta  
gggtccggattaaaaataaataaaacttttaaggtctccgggtggtgtat  
ccttggtggacancgccatctgtgcctcatgttataaggacactcaattgaattct  
ctgtcatcagtcactgcactggccccctgcccttatgagtggtgccaacactaagca  
tactggtgcagatggcatgtatagtgacactgttcactctttggggatgttattggg  
tgggtctcacccttttagccgagttgcagtgctgttaaggcacgtactcaaacgct  
gttaaggaacggactcaaatgtccttctaaaggacagctgctgagatggggctcagat  
aacagttgctgaaagtcacattaaactctgagaccttgttctgcttgcttgagga

**Eco #4**

ccctacaccggaggacttaccggcttctgaacctcaggagttagttga  
ctgagatccttgaatttaagcattgctttgggggtgggggtgggtgctccaaaatcgg  
tcagcattgttctgttcacagggaaaaggtttgtgtgtgtgtgtgtgtgtgtgt  
tttatttgtttgtttgtttgatactgtattccaataatttaagggtgggaat  
ctgcctctgtgactcctcacaattagaatatttggctgggcccccaagttgcttc  
tggctcctaaccttttaaatgcaagctctataatagataaaaaccaccattcag  
ttccctaaaattaaagtaagcctgggtccttagtctttgacaaaattcctactg  
ggagagtgagacattttgacagcatttaggcactgtctccaggggatgaggtagcggggg  
tttccccatg

**Eco #5**

ggaatctgtttaggaaattaaaataaaagacattgatttttctggct  
ttcctaaatgactgcttgcaacttcaattccaccacatttagacagcatttctcattc  
tcnagaggacttctgaagccacagaaatagaggtattttccgggtgtttaggg  
cccactggctcagggtgaacctagctccactccaccctcaaaagaactgacctga  
attccctaaaatccatctgtgttttcatctccatttttaagcaattaaaatagct  
cccccaatttcatgttgggaatttctaaaccaacagcaacaacaaccacctaact  
tctacaaatagcttagattttgtgggttcccccaagcttttaaccaagatattgggt  
cccctgfttaggectggateaagatgcccccatftttgcatagaataatttctcatt  
ccccactggatttaattttctggaatctc

**Eco #6**

cctcataaagagcaggcctgggctcatctgc  
tgggtgggttgaaggaaagcaaagagtactgtctcngccctgtagccattgggggct  
gcccttggcctgcttgcaggctcctcttctgtggcctagaggattgctttgggaaagtc  
tgggcagtaccttacttccccctccttgcctgcatcctggcctccccctgatcag  
gaccagatgtccttggagcaggaattcttagctattttgtagccagccgttctgtgac  
ttctgataagcaaatgttctctacagagttggcgtggaagagtaggagaaggagg  
agagagaacaatatgccaccctctcatcttctgtgccagtgacgcccagagaggtt  
ctggccaactccagaagcttcttgacacatactagggtgataaaaggtatgctagt  
gcccaggagatgcaagtggg

**Eco #6x (11f)**

gacactcctaccgtgataaaaaattcattaagagtgga  
gaaaagaatcctaaaaagtgggtcaataaaaatactagttacttttgatgttgctgtc  
accaaatgcttgacaagaagcaactggggaagggaagttgtttggccttagatgaag  
ggagtgtagtcagtcacagtcacagtggggtaaccatggttagcaagagcagtttacagc  
gcctccatggaagccttctcacatctggatgggtcaagaatcagagagatcagaagcggg  
gctgggggatgctggttactgctgttgatgcatcacctatctagcaagcacctc  
tgaattcaggaacagcaggaggtactgctgggctggaagacctagcaaaaggggga  
gaaggctatcaggagaaaaggccagagacctgtgttcttctacattataagaaggc  
aaggaccactgaggagcctgtggcctaagcaggatggaaGaaagagtacacctcgggcc  
ttacacatgccgaagctccttctgcagcgtgtgacctcccAccatggaccct

**Eco #7 (12f)**

tagaaggTgagagaGgctgtgtgcagatgactcctgtgtgagatggcag  
gagcctggtgacctttgagcagcgcgggaccctggcacattactaggggttccaa  
actagggcagggcagcagaagagggttttctgggctgctgggcatgaagaaggaca  
gaactggactcttagaccaaggtggtctttatgatctgtatgtgtgtgtgtgtgtgt  
gtgtagaatccaaaacagggtagtctttaaacttctctcaggcaccttctggtct  
tcctgtgtgatacttctgtggaattcttctcatcaacaatgcaaggtgctggctct  
gcctgacggggttaggctgtggcactggcttgcactttgtccaccgacaacagcaggt  
tgaaggatgcaagccagttctgtgcagcttccatgtgcttctcagaatctacagg  
caggcgggcaacagtgtaGaatggcaggttcttactaagggctggagctgctggctc  
tctctcagcctaggagactgagaaaagcagttccatggaagagcttccgttccctgct  
gtgacatgatggcacacagttcaactgtctcatgctatggtgagatatgagaatcacta  
ccatgcctggccatggaggagcatgaggaagg

**Eco #7x (13f)**

tttagcaactgaccttctggtcagtcctggt  
tgacctactattacaaaataccagttgccctactattataaaaatacaagtcagagagga  
gccctacttcgagtccaagaaaagagcaggtggcagaagaatggattcaaaagtctccac  
aacctccttgaagaagaaaaggaaagctttaggacctgtggtgtgagctctcga  
tctcagcttgaggtatgatgtgggagaaggccagtgacttcttctttagtttcaaac  
gttctggttgaatcaaacacaaggcatccactgtctctctgaagtccgggtgtgtctgc  
tttggaaagacaagagtggtggaagccatggagatgttacagctcgtgtaacata  
cacaagttctctgattccagttacatctgctccagtttgatatttctatggaacctt  
tggggagatttggccattcaaggccttccctaggtctgagaactcaagatcaggtta  
tggggaatggtcagtgtagggcatgtctccatggtgcttgggttgggaactcagg  
tggaaaggggtttagagaagtttgggttccaagggcc

**Eco #8 (14f)**

cagacctncatttcccactttggccactgccctctgtgtgtgccaccttccccgccaa  
gttcatcaaaaataactgaaaagtaagcaggcttgcacattgggagttat  
atgggatccaagtctgaaggcttcttggaaGagaaaattaggtgccttga  
aaGagaacaaggaattcaagcccaaaGaaGagcctcttgggaaggagtaacctcaa  
atgccatcaaacatatctAgtgttctgaggttaactttatggggagcaaGagtgggt  
agggttggcatcccaaatagcaTatgggtcagcttcatgataccgggtgttaacaaa  
gtAGagggtcaaggacagtcctantccagttccatcggcagtgctctgtgtcccca  
ccattccctgagttacttcttcatagccTgcctgttccacctatcctttaaacttagg  
gaacttgctaccttcttctGaacttctgaGaacttgggttagcccatgaagcca  
ctgatgataGacacactcaTggggacaaaatgt

**Eco #8-9** (15f) –present in *M. musculus* but mutated in *M. Spretus*)

gtggagagcacaacatgntagaacaatagattgtg  
acgaatatattatggtgtccagggaatagaaaaactgtgtagaacgggtgtgtggagta  
tagagctgagaacagactgtggaagcagagaacggagctttgtgttaaagagagactcg  
agggtagaaggtagaatatctcatattccatattggggtgtaaagaacataatattgtcca  
cagcaaatgaagctagagcatgcacgatggcgaatggagaaactaggaaacattaca**gaa**  
**tact**aagtaagaatgccacaaagtccctctggccttcacacatgtgctatgatatgca  
tatccaggcacataggcacagactcacataaacaataaatacaacttaaaacaca  
aataaatggaggtagaaaatagtgtatggtaacgaggaaggaatgcagagttataaa  
acatatacaaaacatgcaaacatgtagtataaaatagataggaatggcatgaagag  
gagaagggctgggagatagattacagaatggaaaagtgagaggaagcaatgaggtataca  
atatgaaggtgggaagggaatgtgatatgtaa

**Eco #9** (16f)

gtggcccagcagtggccactagggtcctcagcctcagtttccctg  
gcacaatcacctacaaggtatactattacacaggacaagcatgggcttccagaggag  
ctgaacctacctggttctaccaagttcaccgggctcctctgcttccatgctgtctc  
ctgacctgactgtgaagactttcaggtcctcaggtttggacaaatgaccaacctcagt  
aacccatgaggagctttctgctggccactccacttagccttggggccact**gaattc**ac  
tgccaccctgtattctcattctcaggactgtccccacagtgctcctcactgagatt  
ctaagctgggaaaaaagaagaatcgtctggctgtctccaatcaagtgtgcttacagca  
tcctgggagctctgggaactgtcacctcaagcctagagtgcagccagtgctgagaggaag  
aggcatccgctggggacagctggaaggacatagaaggtgagggacaaattcagcaagg  
gtagtgtctgtcctggaaaaggacatgctaggagtttgctttagaacttcttggagg  
aacaaggccc

**Eco #9x** (18f)

gtccgtattctcagatctgacggggccagagccaggacagaggaagagggtt  
ttgcagccagcccagctgggacagcaacaacctctggggtctctcttcccttgcct  
gcccaccaggggtctggctggggccagagctgggggagacttctcattatctctg  
cagccggtggccagccetaagcctggaatcccgggtcaggtaaggttgcctgcctgc  
tgtgagcagcttgagctggtcagaagcccagctgagcaggggctggattgaa**ga**  
**attc**tgggaaaattgcttgggctgtttggggaccaacaaggcaatgaaggca  
tggttacatcggtttttttttttnggtttttt

**Eco #9x** (18r)

ggctcctttttgccatctagaaggttctggaagccctctggcttcttttctgtg  
ggcacaaccgntntcccttctgtaactctgcttctacatggactatagccaaagt  
aatcacgccctgacctgttactttactgcagactaggccatgtcaacattgagcagc  
accagccctgctcaatagaccctgactacaaaaaaaaacaacaaaaaaaaa

**Eco #10** (19f)

ccacatggttgaggagaataatccctagcagatctctgcttattggttaactagcct  
caatacaggataactgtgtgcttggagcttagatccccaagtctataggaccccaggc  
tccagcttgaagctccccacccccacccaagtgtgacttctactctgggctgctg  
aggacccctggaagccttctgccccatgccagttctgacatacaaacactact  
agcaacactcccaataateacctatatacaaaagctgccctgttgaaggccccca  
ttgggctcagggtcaataagact**gaattc**caagacctaagaccctggcagagctgctg  
actcagggaagccatttactattagctctgctcaccatctgcttccaccctgg  
ccagatctacagcccactatcaaccaccagactccccctggccagagctccttca  
ccatcatctgcatgattgtgtgtctgactccaagaccctctatcccaacccaa  
actccaccgtgcttctcagctgctcacaactccatggcaaggcaagggaatgg

**Eco #10x (20f)**

cgaagttaggaatcttctccccctccccactccctaccacacccccacccccca  
ccctgctgcaggcaagacatgatggctattcagggctgggggcagcagggtgaaaga  
tgccanaaataaaggtggaatggccagcctgtagccaggagctgctcatagctgaccag  
tcaggtaaggcccaaaagccgccaggctggtggggtcagctagccttggtgagagat  
cctcggggctcaaactgcttgatgaattcctcangacaaaagatgggggtccttgaggctg  
tcacagatcccccttatgtcccaggccaagtccccacgttcttggctgcaggtgagt  
ttcccagcactgatactgagggtagcctgctactgactctgtctccaacagaggaga  
ggactgggaccagccttcccccaaatggagcacaggctgtgttgagcccaGatcaa  
ctctgtgatctgtttcccctaGctgggaagaggagcaggtgggaagagatagcacagg  
gtggtgctgctgagtctagccttgcctccagggtctctggccc

**Eco #11 (r22f) (43 b deletion in *Spretus* at 79 b upstream of the Eco RI site)**

ctcctagaatgcaagaaggcatctatctaggtaaagccttggccagggg  
ccccactcagcccatttctgagctccatgatcaaggtcaccctgggaattagatggtt  
ggcaagcaggtggtgctgccaccctaatcccactgcccttccactggggaagaactgtt  
ccgcatgctgtaagggtcccccttaactggtccctttttctcagcacagaacttt  
ggcctatctaggaggggagatgggagaattcgaatcccacaagggtgtgggtagagct  
ggtggccacattcaagggtgatgctgtaataaggcttctcagaatagccaataccaga  
ggcaagaggacttctgctcagttatctggggaggccgctggtgctactgggctc  
attgaagacgtggtgtaagttctcaaagtgtgctgttctggccaagtatctcctatc  
cctgtaacaagcctggagctaaccaggggttctgggtagactctcaggggttttacagc  
gcct

**Eco #11x (r23f)**

ggcagcctcagagaccaactctctgcacagagc  
taagtgaggacctggagccttctggataggccaagtcagttcaactggctctgaagtg  
gggaccaagtagaccagtgaaatagccccctggtgttactccaaagaatccaggcattg  
gctgctgttgaaggcctcgtgctgaggatttagtaaaactgtaacggaagcttgat  
aggtaatgtggcagtaatcccataaaggagcaatgctcctcatggccttcgattgttg  
atggcacttgcttggcagggaattcctcaaaaggacagggaatggaggccccacactag  
cacagctcactaccactgaaatggtgcttaaggaggtgctaggccaggaggtcagac  
cattctctgcttagagacccaagttactgtaccagagaccctgtaacttagttca  
cagcaatccatgtaagccagcatccattcccaggtatccccatggcatttctaatct  
gaagcccccttctctatgtaaggtgtgcccctggatattcatgtgggaactgagac  
cacatgaaggtacttctcagggtaggctccaattggactagtaccag

**Eco #14 (14f)**

actcctattgctctgcttctacctcccagtgctagggcatgctcctcat  
atctgtttatgtagaaccaaggattgaattcgaacttggfacctgctaggcaagcatt  
ctatcaactgagtcatactctgattctatfttaactttaaacttagtgcaggcaa  
gatcaggcagctcccatagtaacaatgacctagtaacaactgtgttacgfatgtagc  
ccatgcaggcaaaagccacttgggtggcctgctgctgtaccttggctttgagact  
tccattccagatggggcatctccattcacaagattccataagttacctgggggtgcca  
tggaaagagtgcactagctaggacaccacaggaactctgtagatgagaacttagggtatg  
gcagccttctgtccagtaaggggttctggatgttgattcccaccaccagaacata  
gaggcaaggcaaatggaactggacacagtgataggccttaataaaaggacttaa  
gagataagtctggcataccagctccaccatgtacctactgagtttccctctctctac  
agaagaggaaactgtctataggtccaaccatctctgacctgacactggfacaggtaa  
ccagtggtccctaaagctcatagggcaacaaaagatgttctaggtacagctatggag  
cattagaaaaagaggaggaacttctagaaggtaaaatggctcccactgctcggatcag



**Eco #31 (31r)**

caggaggagtgaggtgaagtgaagggcagggctgggtctagatgagccaatggatagata  
gatgatggatagcaggtccagacaaggaacaggggggggggnctacca

**Eco # 33 (33f)**

aagtcttcagagcgttggtctcttgaccag  
taattccagttctgggaatgtggcctaggcaatagccctcaagatggaaaatgattct  
gccagcgttattatgattgtaaaatattggggaagcctgtgatcggggaatggttagg  
aaaattatggttgccaattgatggaatattatgtggcattcaaaatattgaaga  
ctatgtaaaacatggaaaaacttatgaatagtgctaaatTTTTTaaagcagaatt  
caaggctatatagacagtcccgtgcttgaaaaacatagtcaggatctttatttccaag  
aactcatgtagaaaaaacaggaagaataaagatcttttcccctcccgtgcctt  
tccacagtctggctgggtgagtgaggagaattatggatggattttccccttcatt  
tgactttatgtatttccaaatTTTctaatgaggtttttatttcatattgagaaca  
taataattttctaaga

### Note N3: Primer sequences

A set of 32 forward primers and one reverse primer (\*) were used for 3C analysis. Each primer was marked as F (forward) or R (reverse) followed by the length (in nucleotide number) to the target EcoRI site. There were three insertion/deletions leading to polymorphic lengths (Eco #1, 7, and 11). In each case maternal allele was listed first, as in T21B-Eco#1-F90/112, forward maternal 90 bases, forward paternal 112 bases.

The size of a specified 3C cross-linked product is the sum of the two EcoRI fragments plus 4 bases AATT (overhang EcoRI site). For example, the predicted Eco#3-Eco12A cross-linked product is  $F98 + F132 + 4 = 234$  bases; and the Eco #3-Eco12B product is  $F98 + F129 + 4 = 231$  bases.

|      |                  |                                |
|------|------------------|--------------------------------|
| T9C  | -mLit1-F114      | TCCAGCTAATGTCATCTATATCCCTTG    |
| T11B | -mAsc-F100       | GGATATCTTGGATGTTGGTCCTTCCCTT   |
| T13B | -mTh-F97         | GAGGATCTTAGGCCCTGTGAGACCCT     |
| T15B | -Ins-a-F129      | GAAGGTTTTAAAGCCCAGTGACAGCCTT   |
| T17B | -Ins-b-F104      | ATACTGCAGGAGGATGTACCACAGGGCTT  |
| T19B | -Ins-c-F98       | GTGGAGGCTCTCTACCTGGTGTGTGG     |
| T21B | -Eco#1-F90/112   | CCTGCATTCTTCCCTTCCTAAACAATCAGT |
| T23B | -Eco#2-F92       | TCACTATACATGCCATCTGCACCAGTAT   |
| T25B | -Eco#3-F98       | AGAGGCTGTGTCTGGTGGAACTGGAGACT  |
| T27B | -Eco#4-F111      | TTGTTCTGTTACAGGGAAAAGGTTTTGTTG |
| T29B | -Eco#5-F91       | ATTAGAGGTGATTTTTCCCGGGTGTGTGA  |
| T31B | -Eco#6-F37       | CTCCCCTCGATCAGGACCAGATGT       |
| T33B | -Eco#6x-F101     | CATCTGGATGGGTCAAGAATCAGAGAGAT  |
| T35B | -Eco#7-F182/160  | GGGCCATGAAGAAGGACAGAACTTGGACT  |
| T37B | -Eco#7x-F109     | TCGAGTCTCAAGAAAAGAGCAGGTGGCA   |
| T39B | -Eco#8-F105      | AAGTAAGCAGGCTTGCATCATTGGGAGTT  |
| T41B | -Eco#9-F105      | ACTGTGAAGACTTTCACGGCTCCTCAG    |
| T43B | -Eco#9x-F145     | GGGGAGACTTCCTCGATTTATCTCTGCAGC |
| T45B | -Eco#10-F113     | CCAGTTCTGCACATACAAACCCACTACT   |
| T47B | -Eco#10x-F86     | AGTCAGGTCAAGGCCCAAAGCCG        |
| T49B | -Eco#11-F171/128 | TAATCCCCTGCCCTTCCACTGGGGAA     |
| T51B | -Eco#11x-F90     | GGAAGCTTGATAGGTAATGTGGCAGTAA   |
| T53B | -Eco#12A-F132    | CACAAGGAAAGAAAAGGTTGGTGAGAAAAT |
| T55B | -Eco#12B-F129    | CAAGGAGACCATGCCCTATTCTTGGAC    |
| T57B | -Eco#13-F142     | GTGAGGCTGTCTTTGGAGAATTTACAGGAC |
| T59B | -Eco#14-F46      | TGCTAGGCATGTCCTCCATATCTTGT     |
| *T60 | -Eco#14-R119     | TGTTGTACTATGGGAGCTGCCTGAT      |
| T61B | -Eco#15-F91      | GAAGACCTAGAGGCCATGATTCTCCCA    |
| T63B | -Eco#16-F69      | AGTTTGAGAATTTGCCCACTAACCCCAA   |
| T65B | -Eco#27-F83      | TGAGAGCACTGACTCCATCTCAGGGGGC   |



|                   |                                   |
|-------------------|-----------------------------------|
| T69B -Eco#29-F78  | ACATCTCCACCCCTTGATAAACCAAGAGT     |
| T71B -Eco#30-F80  | AGGAATGCACCCTTAGGCTCTGTGTGGC      |
| T73B -Eco#33-F100 | CAATTGATGGAATATTATGTGGCCATTCAAAAT |

#### Note N4

We have observed predominantly maternal interactions from the E#3 target in fetal liver (Fig 4B) and in mouse embryonic fibroblasts (Fig. 3B). We also observed a few random interactions within the paternal allele in the vicinity of the *Igf2* E#3 target in embryonic stem cells SFG (Fig. 5B). More interactions were observed within each maternal and paternal allele as the chromosomes were compacted in cells treated with Nocodazole (Fig 5C). The compactness of higher order chromatin structure of the maternal allele versus the relaxed chromatin structure around the paternal *igf2* was reflected in the predominance of maternal interactions near the *Igf2* E#3 target site.

In the case of newborn liver that demonstrated high levels of paternal *Igf2* transcription, such contrast is more extreme (Fig 4B). The frequency of random interactions within the paternal allele was much lower as compared to the frequency of interactions within the maternal allele. Such low levels of paternal random interactions presumably can be detected in some fetal livers with higher input 3C DNA and/or a greater number of PCR cycles. To verify that, we have performed independent 3C experiments on several fetal livers using more input 3C DNA (~800 ng) and more PCR cycles (23 cycles of second PCR). We could detect some random paternal interactions (paternal interactions from E#3 target to E#2, E#7x, E#9, E#9x, and E#12B) along with the predominant maternal interactions near *Igf2* E#3 target site (Supplement Fig. S1).

## Note N5

One might question why the interaction from E#3 target forward primer to E#14 forward primer was detectable and of maternal origin (Fig 4B) while the interaction from E#14 target reverse primer to E#3 forward primer was undetectable (Fig 6AB).

Since 3C involves the ligation of two DNA fragments in the same nucleus vicinity after formaldehyde fixation and restriction digestion, switching from forward to reverse primer sets does not necessary yield similar abundance of the products. Forward and reverse primers at a specified restriction site are incorporated in two separate DNA fragments. Each of the two DNA fragments is 3C-ligated to another target DNA fragment with varying efficiency depending on the topology of the two 3C DNA fragments.

The interaction from E#3 target forward primer to E#14 forward primer (Fig 4B) represents the 3C interaction of the fragment E#2-3 and the fragment E#13-14. In contrast, the interaction from E#14 target reverse primer to E #3 forward primer (Fig 6AB) represents the 3C interaction of the fragment E#2-3 and the fragment E#14-15. Differential DNA-binding proteins in the E#13-14 chromosomal DNA and in the chromosomal E#14-15 DNA may affect the topology and therefore the abundance of the 3C products. The 3C interaction between the fragment E#2-3 and the fragment E#14-15 was low and not detectable in Fig. 6AB.

In Fig. 6AB, reverse (but not forward) E#14 target primer was chosen because of the presence of a polymorphic KpnI site near the reverse primer. Also note that the presence of both forward and reverse primers at the target location (Fig 6A column E#14) resulted in a local 3C re-ligation product (E#13-14 and E#14-15) that was unique at this target site and was derived from both parental alleles (Fig 6B column E#14).

## Note N6

Kurikuti *et al* studied newborn liver and observed ICR-MAR3 interaction exclusively on the maternal allele using ICR reverse primer (E#12B) and MAR3 reverse primer (Eco RI site between E#6 and E#6x). We used E#12A forward primer and E#6 forward primer and performed 3C in newborn liver, MEF, and SFG1 cells. The target restriction sites in the two studies are close but not identical. Furthermore the primers in the two studies are in reversed orientations. In all three tissue/cells our results do not support close vicinity of ICR and MAR3 (depicted by E#12A forward – E#6 forward primer combination) on the maternal allele (MEF: Fig. 3B, E#12A Hpa II, column#6; Liver: Fig.4B, E#12A Hpa II, column#6; SFG1: Fig. 5B, E#12A Hpa II, column#6). Therefore, our proposed model (Fig. 7) differs substantially from the Kurikuti *et al* model, in that it does not illustrate a DMR1-MAR3-ICR looping on the maternal allele. We propose a knot looping with close vicinity of DMR1-ICR-Ig and Endo Enhancers on the maternal allele. On the paternal allele, the relaxed chromatin structure may result in local and random interactions from the ICR.

## Note N7

We have shown that “switching target and forward primers” in all cases (except for some rare instances) resulted in consistent results. That was evident in many 3C panels across 24 target location sites (for examples, 12 panels in Fig 2B, 12 panels in Fig. 3A, 15 panels in Fig. 4A, and 12 panels in Fig. 5A ). While analyzing hundreds of 3C samples in series of 24 panels we obtained >99 % consistency (for example, consistency in  $(24 \times (12+12+15+12)) = 1224$  panel columns in Figs 2-4). There are some anomalies (< 1 %) that may appear in rare cases where PCR and/or gel loading are variable. The intensity of the 3C product after Hpa II digestion in Fig. 5B, E#3 (column 3, lower panel) was weaker than expected for the juxtaposition of DMR1 and ICR, probably because of variation in the handling/loading of this sample. In six other cases including the three tissue/cells studied, the combinations of DMR1 forward primer – ICR target forward primers (E#12A and E#12B) resulted in all major 3C products (Figs. 3A, 4A, and 5A; panels ICR-E#12A and ICR-E#12B; column 3), which is consistent with a close vicinity of DMR1 and ICR..
